# Supplementary figures and images for: Growth modulation of atomic layer deposition of HfO2 by combinations of H2O and O3 reactants
Source: Royal Society of Chemistry journal article supplement (doi:10.1039/d1dt03465k), 2021-01-01

Algorithm : 1<sup>st</sup> ALD cycle

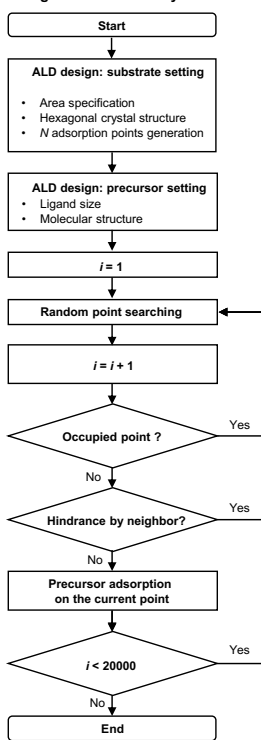

Algorithm : After 1<sup>st</sup> ALD cycle

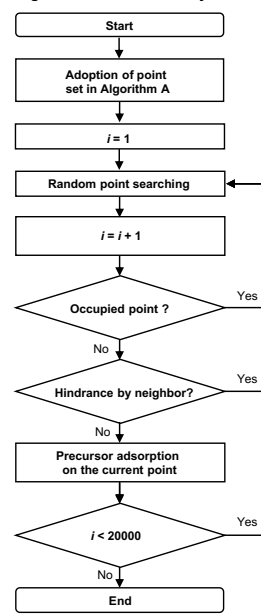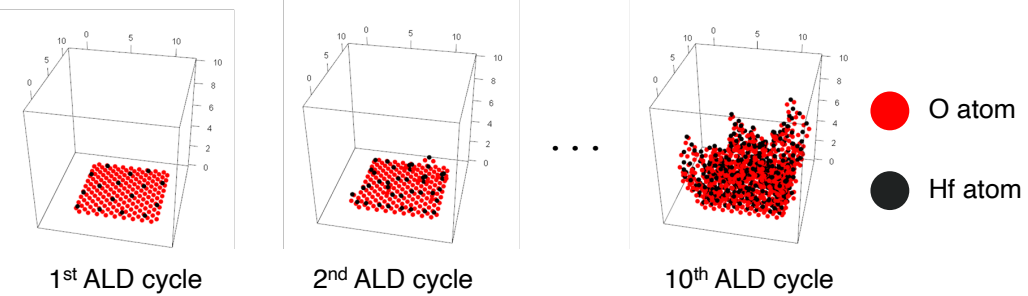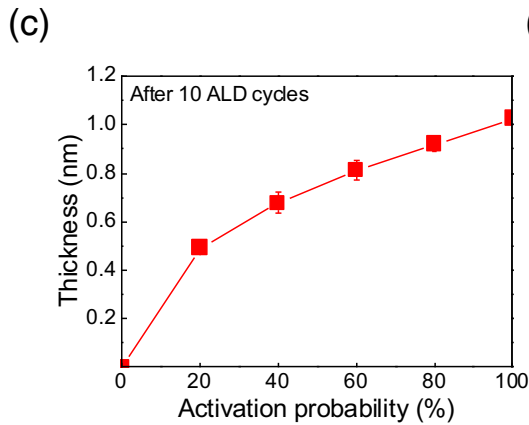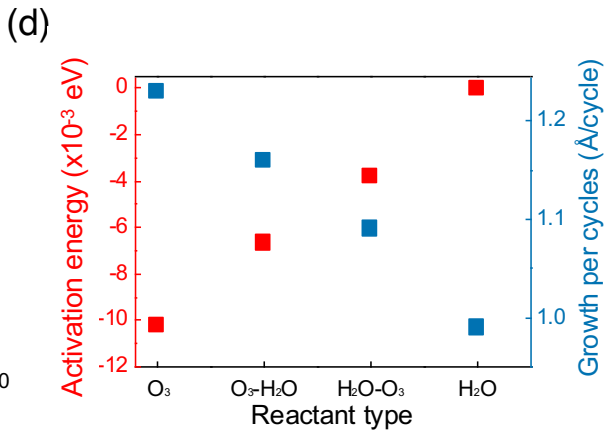

Supplement: d1dt03465k2.pdf [file d1dt03465k2.pdf]

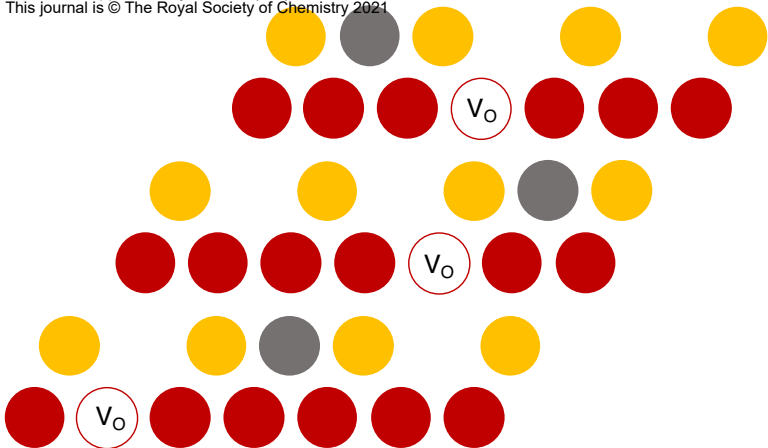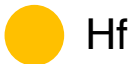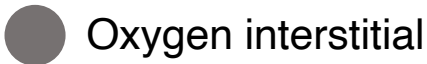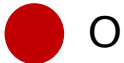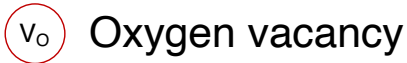

Supplement: d1dt03465k3.pdf [file d1dt03465k3.pdf]
